# Supplementary material for: Combined post-modification of iodide ligands and wide band gap ZnS in quantum dot sensitized solar cells
Source: Royal Society of Chemistry journal article supplement (doi:10.1039/c4cp02520b), 2014-07-11
Supplement: c4cp02520b1.pdf [file c4cp02520b1.pdf]

## Supporting Information

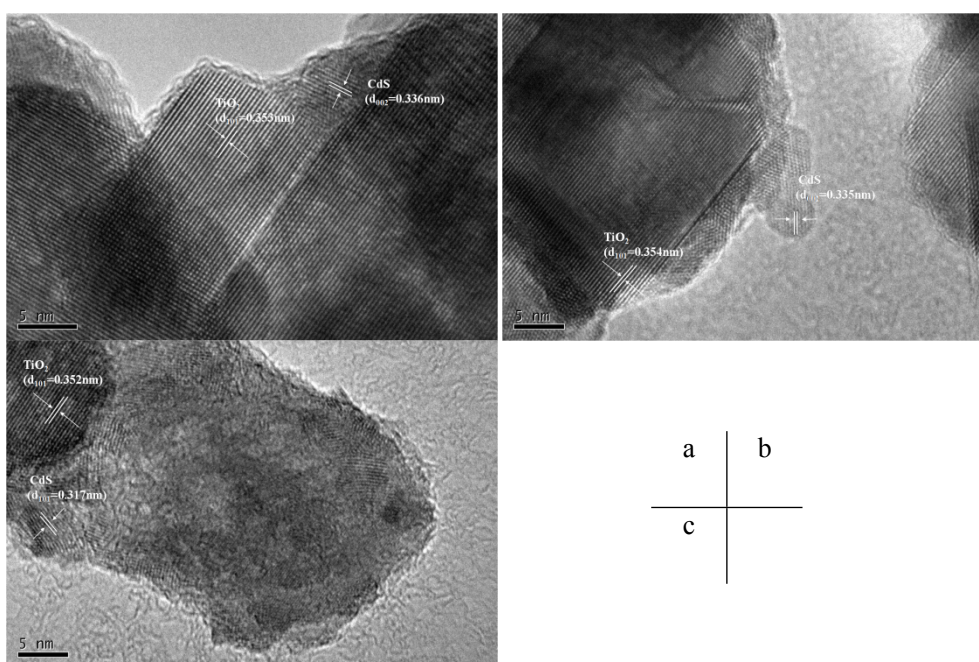

**Figure S1.** HRTEM images of different combined post-modification structures of photoanodes sensitized with QDs. (a) TiO<sub>2</sub>/CdS, (b) TiO<sub>2</sub>/CdS/ZnS/TBAI, (c) TiO<sub>2</sub>/CdS/TBAI/ZnS

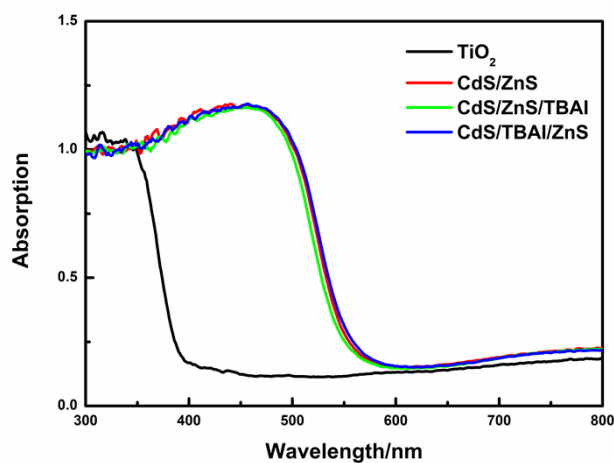

**Figure S2.** UV-Vis absorption of CdS sensitized photoanodes.

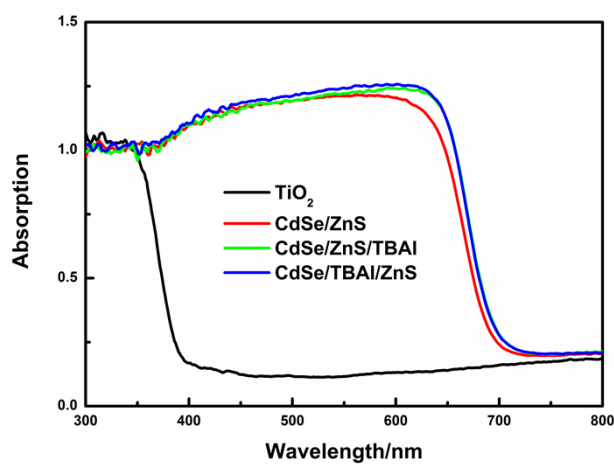

**Figure S3.** UV-Vis absorption of CdS/CdSe co-sensitized photoanodes.

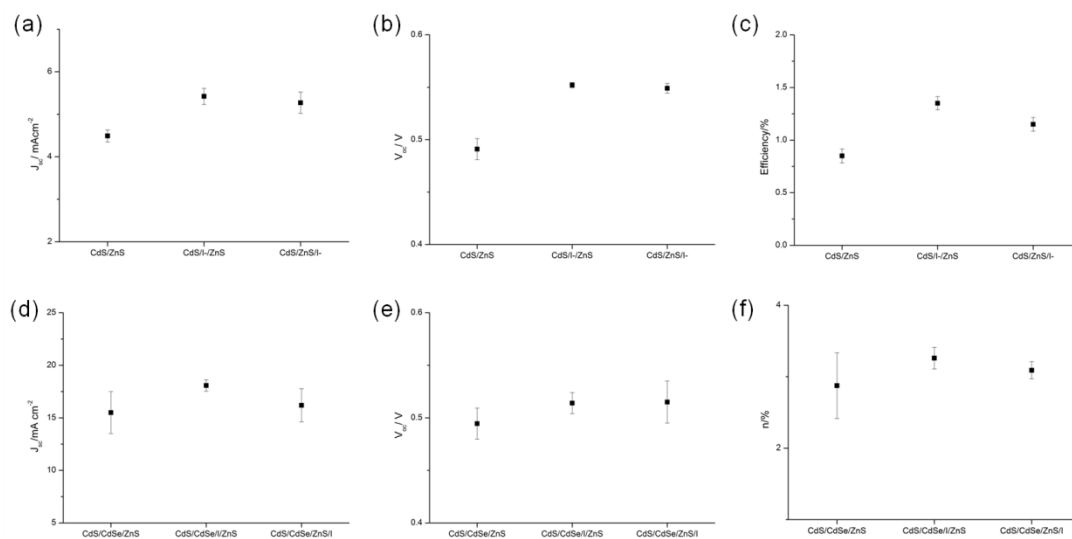

**Figure S4.** Error bars for the CdS-sensitized solar cells and CdS/CdSe-sensitized solar cells. The data was recorded by measuring three solar cells with the same components. (a-c) parameters of  $J_{sc}$ ,  $V_{oc}$  and efficiency for CdS-sensitized solar cells, respectively; (d-f)  $J_{sc}$ ,  $V_{oc}$  and efficiency for CdS/CdSe-sensitized solar cells, respectively.
